# Supplementary material for: Soluble μ-Fibridged niobium clusters: synthesis and crystal structures of (Et4N)6[Nb6Fi6Bri6(NCS)a6]Br2and Cs1.6K2.4[Nb6Fi6Ii6(NCS)a6]
Source: Royal Society of Chemistry journal article supplement (doi:10.1039/b400668b), 2004-01-01
Supplement: b400668b.pdf [file b400668b.pdf]

**Figure S1.**

Two orientations of isolated anions in  $(\text{Et}_4\text{N})_6[\text{Nb}_6\text{F}_6\text{Br}_6(\text{NCS})_6]\text{Br}_2$  (**1**) and  $\text{Cs}_{1.6}\text{K}_{2.4}[\text{Nb}_6\text{F}_6\text{I}_6(\text{NCS})_6]$  (**2**)

a) along three-fold axis;

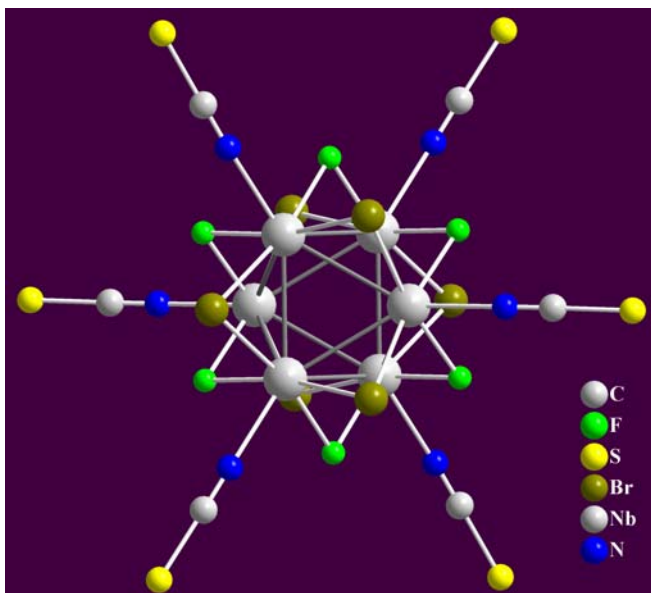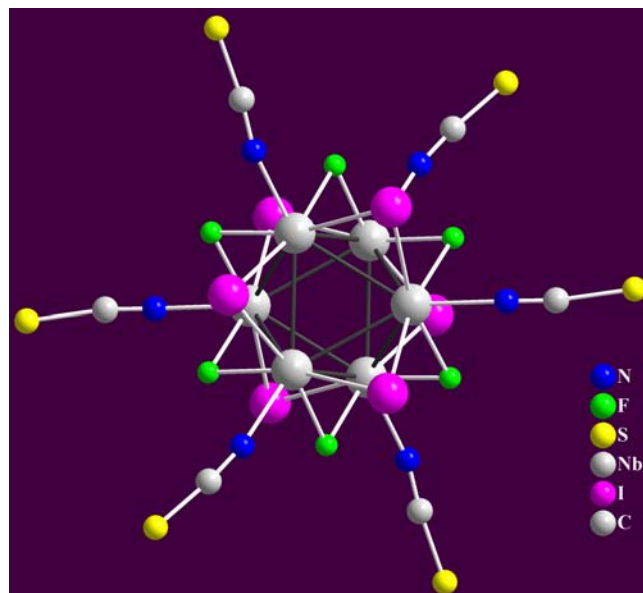

b) showing plane of six fluoride ligands around  $\text{Nb}_6$  cluster.

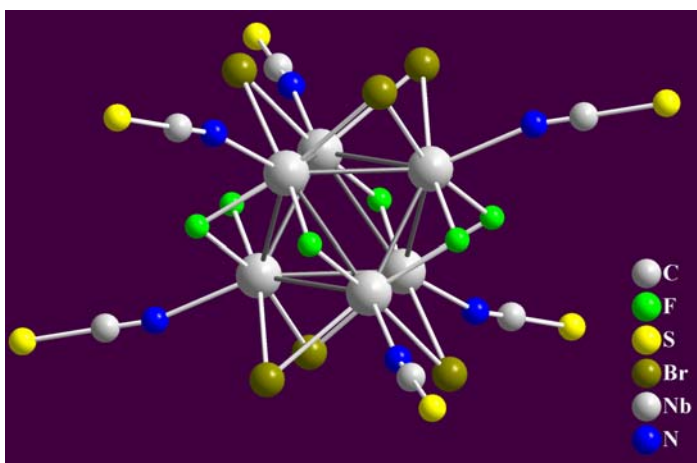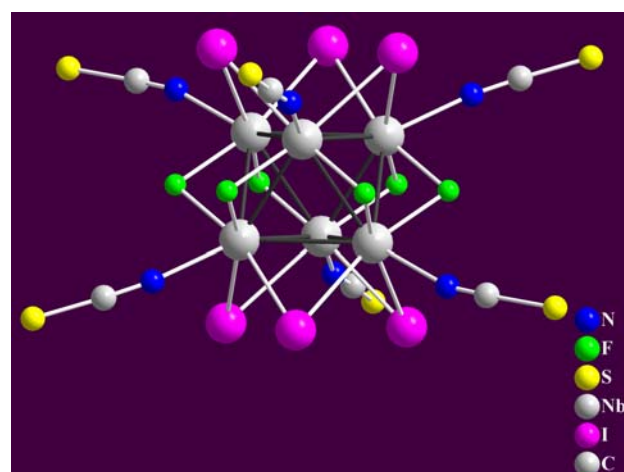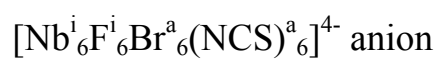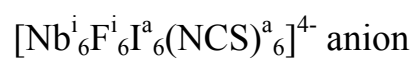

**Figure S2.**

- a) Environment of Nb<sub>6</sub> cluster in parent Cs<sub>4</sub>Nb<sub>6</sub>F<sub>8.5</sub>I<sub>9.5</sub>. Occupancies of disordered I<sup>i</sup> and F<sup>i</sup> in Cs<sub>4</sub>Nb<sub>6</sub>F<sup>i</sup><sub>8.5</sub>I<sup>a</sup><sub>3.5</sub>I<sup>a</sup><sub>6</sub> are 0.5 and 2.5, respectively.

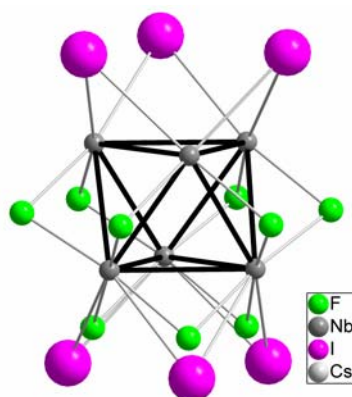

- b) Possible isomers of Nb<sub>6</sub>L<sup>i</sup><sub>12</sub> cluster core in parent Cs<sub>4</sub>Nb<sub>6</sub>F<sub>8.5</sub>I<sub>9.5</sub>:

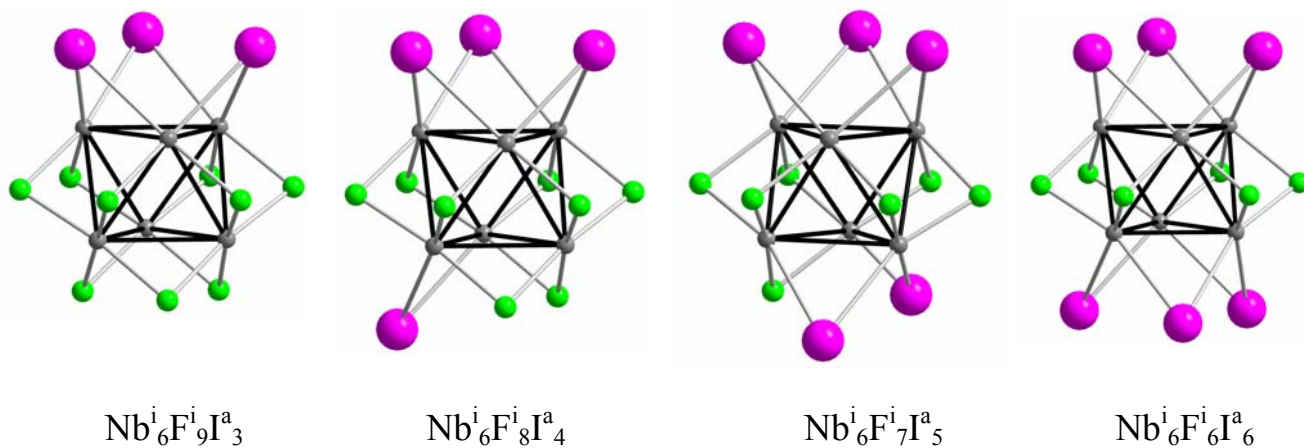

- c) Cluster core in isolated  $[\text{Nb}_6^i\text{F}_6^i\text{I}_6^a(\text{NCS})_6^a]^{4-}$  anion:

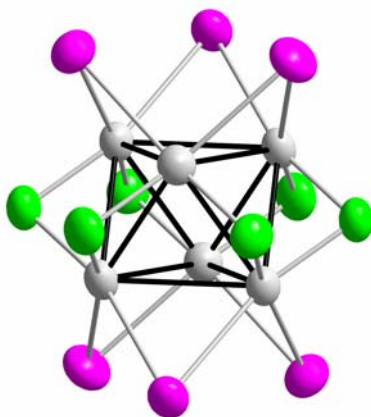

The experimental I/F ratio (9.5/8.5) in Cs<sub>4</sub>[Nb<sub>6</sub>F<sup>i</sup><sub>8.5</sub>I<sup>a</sup><sub>3.5</sub>I<sup>a</sup><sub>6</sub>] could result from an equimolar mixture of Nb<sub>6</sub>F<sup>i</sup><sub>8</sub>I<sup>a</sup><sub>4</sub> and Nb<sub>6</sub>F<sup>i</sup><sub>9</sub>I<sup>a</sup><sub>3</sub> units, or a mixture of Nb<sub>6</sub>F<sup>i</sup><sub>9</sub>I<sup>a</sup><sub>3</sub> and Nb<sub>6</sub>F<sup>i</sup><sub>6</sub>I<sup>a</sup><sub>6</sub> with ratio 5:1. The isolation of **2** with low yield favors the latter possibility although the presence of traces other isomers units (Nb<sub>6</sub>F<sup>i</sup><sub>9</sub>I<sup>a</sup><sub>3</sub>, Nb<sub>6</sub>F<sup>i</sup><sub>8</sub>I<sup>a</sup><sub>4</sub>, Nb<sub>6</sub>F<sup>i</sup><sub>7</sub>I<sup>a</sup><sub>5</sub> and Nb<sub>6</sub>F<sup>i</sup><sub>6</sub>I<sup>a</sup><sub>6</sub>) is also assumed.
